# Supplementary material
Source: Springer Nature journal article supplement (https://www.springermedizin.de/resource/supplementary/13231_2011_37_MOESM1_ESM.pdf/9676414)

# Altered microcirculation

*Leukocyte invasion; Iron deposition? Hypoxia?*

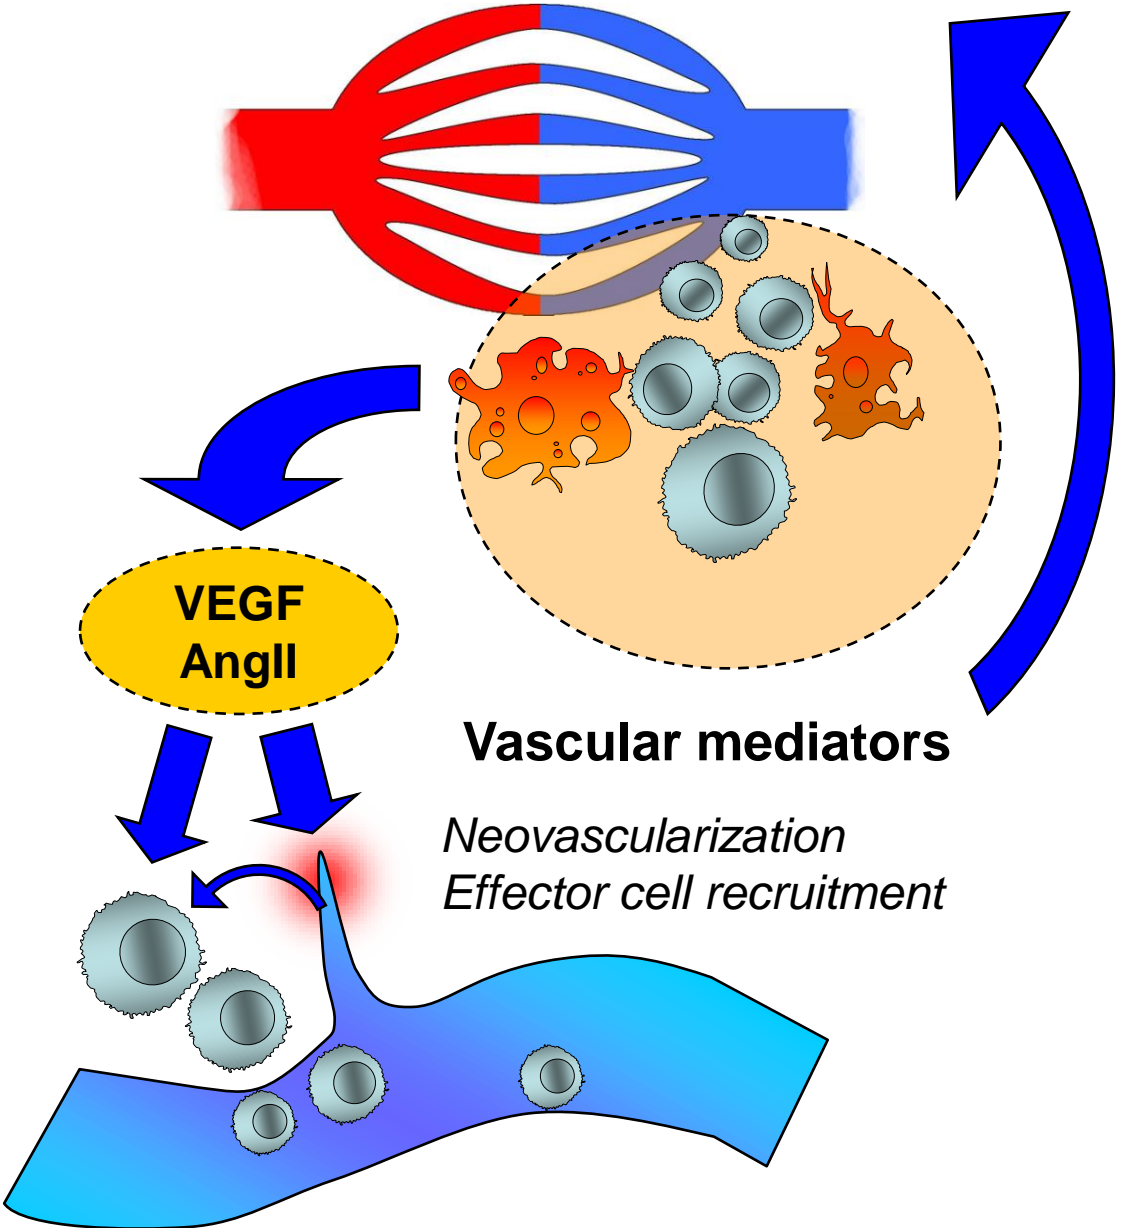

Supplement: MOESM1 [file 9676414]
